# Supplementary material for: DCs metabolize sunlight-induced vitamin D3 to 'program' T cell attraction to the epidermal chemokine CCL27
Source: Springer Nature journal article supplement (doi:10.1038/ni1433), 2007-01-28
Supplement: 41590_2007_BFni1433_MOESM7_ESM.pdf [file 41590_2007_BFni1433_MOESM7_ESM.pdf]

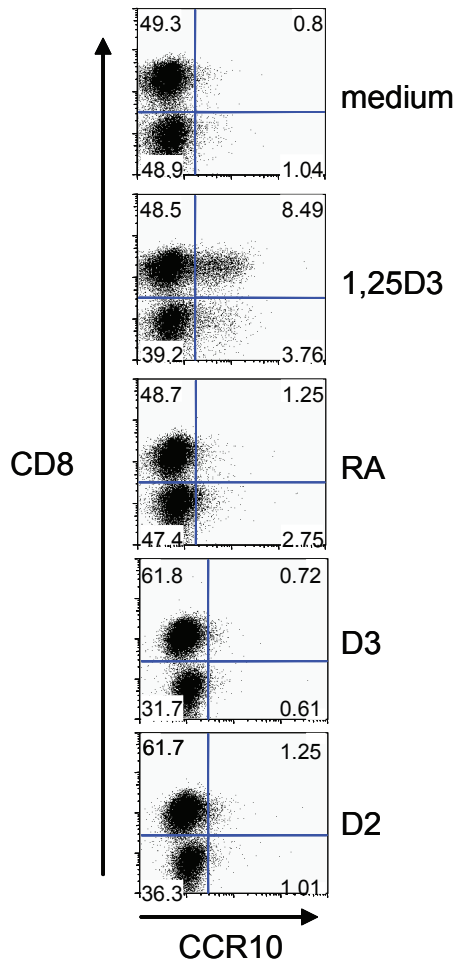

**Supplemental Figure 1. 1,25(OH)<sub>2</sub>D<sub>3</sub> but not retinoic acid induces the expression of CCR10 on CD8<sup>+</sup> T cells.** Naïve T cells ( $0.7 \times 10^6$ ) were activated with anti-CD3 and anti-CD28 in the presence of medium, 1,25(OH)<sub>2</sub>D<sub>3</sub> (1,25D<sub>3</sub>, 10 nM), retinoic acid (RA, 10 nM), D<sub>3</sub> (6000 nM) or D<sub>2</sub> (6000 nM), and IL-12 (2.5 ng/ml). The percentage of gated CD8<sup>+</sup> T cells within the indicated quadrants are shown. The figures show data from a representative experiment of 6–30 with similar results.
