# Supplementary material for: DCs metabolize sunlight-induced vitamin D3 to 'program' T cell attraction to the epidermal chemokine CCL27
Source: Springer Nature journal article supplement (doi:10.1038/ni1433), 2007-01-28
Supplement: 41590_2007_BFni1433_MOESM9_ESM.pdf [file 41590_2007_BFni1433_MOESM9_ESM.pdf]

| Sorted phenotype | Gene           | Systemic name | Activated with anti-CD3 and anti-CD28       |                                             |                               |                    |                    |                    |                    |                                             |
|------------------|----------------|---------------|---------------------------------------------|---------------------------------------------|-------------------------------|--------------------|--------------------|--------------------|--------------------|---------------------------------------------|
|                  |                |               | CLA <sup>+</sup>                            | ? <sub>4</sub> ? <sub>7</sub> <sup>hi</sup> | CCR10 <sup>?</sup>            | CCR10 <sup>?</sup> | CCR10 <sup>?</sup> | CCR10 <sup>?</sup> | CCR10 <sup>+</sup> | ? <sub>4</sub> ? <sub>7</sub> <sup>hi</sup> |
| Treatment        |                |               | medium                                      | medium                                      | +1,25D3                       | +1,25D3            | +1,25D3            | +1,25D3            | + RA               |                                             |
|                  |                |               | + IL-12                                     |                                             | + IL-12                       |                    | + IL-12            |                    |                    |                                             |
|                  |                |               | Memory T cells (fresh CD45RO <sup>+</sup> ) |                                             | CLA+ (sorted after treatment) |                    |                    |                    |                    |                                             |
|                  |                |               | Sorted for ->                               |                                             |                               |                    |                    |                    |                    |                                             |
|                  | <i>CCR4</i>    | 208376 at     | 175                                         | 204                                         | A                             | A                  | A                  | A                  | A                  | A                                           |
|                  | <i>CCR6</i>    | 206983 at     | 2601                                        | 1267                                        | A                             | A                  | 89                 | 101                | A                  | 57                                          |
|                  | <i>CCR7</i>    | 206337 at     | 2911                                        | 3571                                        | 3914                          | 3616               | 3056               | 1845               | 2189               | 5480                                        |
|                  | <i>CCR8</i>    | 208059 at     | A                                           | A                                           | A                             | A                  | A                  | A                  | A                  | A                                           |
|                  | <i>CCR9</i>    | 207445 s at   | 84                                          | 2997                                        | A                             | A                  | 65                 | A                  | 65                 | 955                                         |
|                  | <i>CCR10</i>   | 220565 at     | A                                           | A                                           | A                             | A                  | A                  | 130                | 482                | A                                           |
|                  | <i>VDR</i>     | 204254 s at   | 446                                         | 240                                         | 2008                          | 2042               | 1446               | 1302               | 1093               | 4246                                        |
|                  | <i>CYP27A1</i> | 203979 at     | 244                                         | A                                           | A                             | A                  | A                  | A                  | A                  | A                                           |
|                  | <i>CYP27B1</i> | 205676 at     | 116                                         | 208                                         | 248                           | 273                | 290                | 210                | 191                | 414                                         |

**Supplemental Figure 3. Chemokine receptor expression by circulating memory and *in vitro* activated T cell subsets.** Memory CLA<sup>+</sup>CD45RO<sup>+</sup> and  $\alpha_4\beta_7^{\text{hi}}$ CD45RO<sup>+</sup> CD3<sup>+</sup> T cells were sorted from buffy coats and used to isolate RNA. Naïve T cells ( $0.7 \times 10^6$ ) were isolated by magnetic beads and activated for 2 days with anti-CD3 (1  $\mu\text{g/ml}$ ) and anti-CD28 (1  $\mu\text{g/ml}$ ) in the presence of medium, 1,25(OH)<sub>2</sub>D<sub>3</sub> (10 nM) or 10 nM retinoic acid (RA), and with or without IL-12 (2.5 ng/ml). After 2 days the cells were transferred to new wells and fresh medium containing IL-2 (12.5 ng/ml) added every two days. After 4 additional days, T cells were sorted by FACS according to their expression of CLA, CCR10 and  $\alpha_4\beta_7$  as indicated and used to isolate RNA for microarray analysis. Total RNA from each FACS-sorted subset was isolated using RNeasy mini kit (Invitrogen), and the quality of total RNA was determined by Agilent Bioanalyzer.

The probe generation, hybridization and scanning were performed by the Stanford Protein and Nucleic Acid Biotechnology (PAN) Facility (<http://cmgm.stanford.edu/pan/gene/index.html>), and the Affymetrix human chip HG\_U133\_plus\_2 was used for this study. Microarray data was analyzed using Affymetrix GeneChip Operating Software (GCOS) in combination with GeneSpring software (Agilent). TaqMan-based quantitative Data represent the raw Affymetrix signals: signal strength depends on the probe as well as the mRNA expression abundance, so that comparisons between a given gene among different cell samples is warranted, but differences in values between genes do not correlate with absolute mRNA expression. Experiments were repeated 3 times with similar results (except for the memory T cells and CLA<sup>+</sup> T cells activated without IL-12 or 1,25(OH)<sub>2</sub>D<sub>3</sub>, which was performed once);

representative results are shown. A=absent. The expression of *CCR4-CCR10* are shown, as well as *VDR*, *CYP27A1* and *CYP27B*.
