# Supplementary material for: DCs metabolize sunlight-induced vitamin D3 to 'program' T cell attraction to the epidermal chemokine CCL27
Source: Springer Nature journal article supplement (doi:10.1038/ni1433), 2007-01-28
Supplement: 41590_2007_BFni1433_MOESM10_ESM.pdf [file 41590_2007_BFni1433_MOESM10_ESM.pdf]

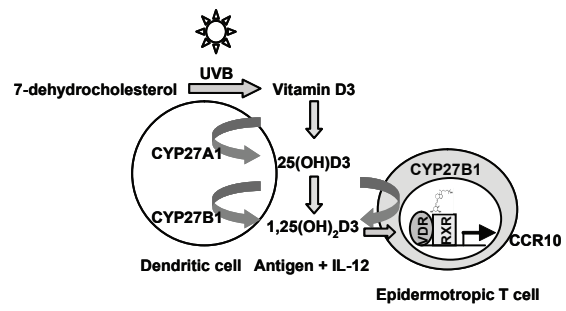

**Supplemental Figure 4. Schematic summary of the proposed role of sunlight, vitamin D and dendritic cells in the induction of CCR10 on T cells.** Sunlight generates vitamin D<sub>3</sub> locally in the skin, thereby inducing T cell CCR10 expression and epidermotropism through a cascade of enzymatic reactions mediated by antigen-presenting DCs and activated T cells themselves, leading to transcription of the *CCR10* gene in response to liganded VDR. DCs express the cytochrome p450 enzyme CYP27A1, which can catalyze the 25-hydroxylation of D<sub>3</sub>. DCs and T cells each express the 1-hydroxylase CYP27B1 and can convert 25(OH)D<sub>3</sub> to the active 1,25(OH)<sub>2</sub>D<sub>3</sub>.
